# Supplementary material for: Melatonin Treatment Improves Renal Fibrosis via miR-4516/SIAH3/PINK1 Axis
Source: MDPI journal article supplement (doi:10.3390/cells10071682), 2021-07-03
Supplement: s1 [file s1]

Supplementary table 1. List of previously identified target genes of miR-4516 related to E3 ubiquitin protein ligase retrieved from mirDIP.

| Gene Symbol | Uniprot | Integrated Score | Number of Sources | Score Class |
|-------------|---------|------------------|-------------------|-------------|
| SIAH3       | Q8IW03  | 0.314188206      | 9                 | High        |
| PPP1R11     | O60927  | 0.298769649      | 9                 | High        |
| FBXW7       | Q969H0  | 0.287065639      | 8                 | High        |
| RLIM        | Q9NVW2  | 0.27055211       | 9                 | High        |
| ZFP91       | Q96JP5  | 0.266212724      | 6                 | High        |
| JADE2       | Q9NQC1  | 0.255994518      | 9                 | High        |
| TRIM41      | Q8WV44  | 0.251925558      | 9                 | High        |
| HECTD4      | Q9Y4D8  | 0.215036497      | 9                 | High        |
| RNF19A      | Q9NV58  | 0.207907704      | 9                 | High        |
| KCMF1       | Q9P0J7  | 0.204549263      | 8                 | High        |
| TRIM62      | Q9BVG3  | 0.201592282      | 8                 | High        |
| RNF114      | Q9Y508  | 0.199811561      | 8                 | High        |
| RNF220      | Q5VTB9  | 0.197634454      | 8                 | High        |
| RNF144B     | Q7Z419  | 0.19727441       | 6                 | High        |
| UBR7        | Q8N806  | 0.19592164       | 9                 | High        |
| TRIM13      | O60858  | 0.190153657      | 9                 | High        |
| RNF115      | Q9Y4L5  | 0.183936719      | 9                 | High        |

Supplementary table 2. List of previously identified target genes of miR-4516 related to E3 ubiquitin protein ligase retrieved from miRDB.

| Gene Symbol | Target Rank | Target Score | Gene name                                                                                           |
|-------------|-------------|--------------|-----------------------------------------------------------------------------------------------------|
| SIAH3       | 41          | 94           | Siah E3 ubiquitin protein ligase family member 3                                                    |
| RNF19A      | 315         | 80           | Ring finger protein 19A, RBR E3 ubiquitin protein ligase                                            |
| HECTD3      | 744         | 67           | HECT domain E3 ubiquitin protein ligase 3                                                           |
| UBR7        | 960         | 62           | Ubiquitin protein ligase E3 component n-recognin 7 (putative)                                       |
| NEDD4L      | 1261        | 55           | Neural precursor cell expressed, developmentally down-regulated 4-like, E3 ubiquitin protein ligase |
| UBR3        | 1383        | 53           | Ubiquitin protein ligase E3 component n-recognin 3                                                  |

Supplementary table 3. List of previously identified target genes of miR-4516 related to E3 ubiquitin protein ligase retrieved from TargetScan.

| Gene Symbol | 3P-seq tags + 5 | Total sites | Gene name                                                                                           |
|-------------|-----------------|-------------|-----------------------------------------------------------------------------------------------------|
| CBL         | 309             | 3           | Cbl proto-oncogene, E3 ubiquitin protein ligase                                                     |
| SIAH3       | 5               | 4           | Siah E3 ubiquitin protein ligase family member 3                                                    |
| FBXW7       | 12              | 2           | F-box and WD repeat domain containing 7, E3 ubiquitin protein ligase                                |
| HECTD2      | 1514            | 2           | HECT domain containing E3 ubiquitin protein ligase 2                                                |
| RNF19A      | 1674            | 1           | Ring finger protein 19A, RBR E3 ubiquitin protein ligase                                            |
| HECTD3      | 45              | 1           | HECT domain containing E3 ubiquitin protein ligase 3                                                |
| MUL1        | 812             | 1           | Mitochondrial E3 ubiquitin protein ligase 1                                                         |
| MARCH7      | 537             | 1           | Membrane-associated ring finger (C3HC4) 7, E3 ubiquitin protein ligase                              |
| RNF20       | 772             | 1           | Ring finger protein 20, E3 ubiquitin protein ligase                                                 |
| MDM2        | 455             | 1           | MDM2 oncogene, E3 ubiquitin protein ligase                                                          |
| RNF128      | 17              | 1           | Ring finger protein 128, E3 ubiquitin protein ligase                                                |
| PARK2       | 55              | 1           | Parkin RBR E3 ubiquitin protein ligase                                                              |
| MIB1        | 897             | 1           | Mindbomb E3 ubiquitin protein ligase 1                                                              |
| TRAF6       | 91              | 1           | TNF receptor-associated factor 6, E3 ubiquitin protein ligase                                       |
| PELI2       | 229             | 1           | Pellino E3 ubiquitin protein ligase family member 2                                                 |
| BTRC        | 96              | 2           | Beta-transducin repeat containing E3 ubiquitin protein ligase                                       |
| RNF125      | 214             | 1           | Ring finger protein 125, E3 ubiquitin protein ligase                                                |
| NEDD4L      | 617             | 2           | Neural precursor cell expressed, developmentally down-regulated 4-like, E3 ubiquitin protein ligase |

Supplementary table 3. Continued.

| Gene Symbol | 3P-seq<br>tags + 5 | Total<br>sites | Gene name                                                               |
|-------------|--------------------|----------------|-------------------------------------------------------------------------|
| HECW1       | 11                 | 2              | HECT, C2 and WW domain containing E3 ubiquitin protein ligase 1         |
| RNF8        | 301                | 2              | Ring finger protein 8, E3 ubiquitin protein ligase                      |
| MARCH3      | 77                 | 1              | Membrane-associated ring finger (C3HC4) 3, E3 ubiquitin protein ligase  |
| HECTD4      | 222                | 1              | HECT domain containing E3 ubiquitin protein ligase 4                    |
| RFFL        | 670                | 2              | Ring finger and FYVE-like domain containing E3 ubiquitin protein ligase |
| WWP1        | 161                | 1              | WW domain containing E3 ubiquitin protein ligase 1                      |
| HACE1       | 191                | 2              | HECT domain and ankyrin repeat containing E3 ubiquitin protein ligase 1 |
| MARCH4      | 68                 | 1              | Membrane-associated ring finger (C3HC4) 4, E3 ubiquitin protein ligase  |
| HECW2       | 28                 | 1              | HECT, C2 and WW domain containing E3 ubiquitin protein ligase 2         |
| HUWE1       | 741                | 1              | HECT, UBA and WWE domain containing 1, E3 ubiquitin protein ligase      |
